# Supplementary material for: Evaluating Metabarcoding Markers for Identifying Zooplankton and Ichthyoplankton Communities to Species in the Salish Sea: Morphological Comparisons and Rare, Threatened or Invasive Species
Source: MDPI journal article supplement (doi:10.3390/dna4010001), 2023-12-22
Supplement: s1 [file s1]

**Supplementary Table S1. Metabarcoding markers and gene regions, references, primer sequences, approximate target sequence length, and PCR parameters**

| Metabarcoding<br>marker name<br>(gene region)                     | Marker<br>and reference(s)                                             | Forward<br>primer              | Reverse<br>primer                 | Target sequence length<br>(median)<br>( <i>N</i> nucleotides) | PCR anneal<br>temperature (°Celsius) | <i>N</i> PCR cycles |
|-------------------------------------------------------------------|------------------------------------------------------------------------|--------------------------------|-----------------------------------|---------------------------------------------------------------|--------------------------------------|---------------------|
| LrCOI<br>(mitochondrial <i>cytochrome c</i><br><i>oxidase I</i> ) | Leray <i>et al.</i> (2013) [48];<br>Geller <i>et al.</i> (2013) [49]   | GGWACWGGWTGAACW<br>GTWTAYCCYCC | TAIACYTCIGGRTGICCRAARA<br>AYCA    | 313                                                           | 55                                   | 35                  |
| Cop16S<br>(mitochondrial 16S <i>ribosomal</i><br>RNA)             | Clarke <i>et al.</i> (2017)<br>[54]                                    | TAAGGTAGCATARTAAT<br>TWG       | TAATTCAACATCGAGGTC                | 301                                                           | 45                                   | 35                  |
| Mol16S<br>(mitochondrial 16S <i>ribosomal</i><br>RNA)             | Klymus <i>et al.</i> (2017) [36]                                       | RRWRGACRAGAAGACC<br>CT         | ARTCCAACATCGAGGT                  | 210<br>*196 with fish blocker                                 | 58                                   | 35                  |
| MiFish12S<br>(mitochondrial 12S <i>ribosomal</i><br>RNA)          | Miya <i>et al.</i> (2015)_<br>[58]                                     | GTCGGTAAAACCTCGTGC<br>CAGC     | CATAGTGGGGTATCTAATCC<br>CAGTTTG   | 172                                                           | 65                                   | 35                  |
| FishCytb<br>(mitochondrial <i>cytochrome b</i> )                  | Snyder and Stepien (2020)<br>[61];<br>Snyder <i>et al.</i> (2020) [62] | GCCTACGCYATYCTHCG<br>MTCHATYCC | GGTGTTTCNACNGGYATNC<br>CNCCAATTCA | 154                                                           | 50                                   | 35                  |

**Supplementary Table S2. Total number of reads (pairs and single reads post-merge) at each step in the quality control pipeline.**

| Marker and Sample       | Raw<br>read pairs | Cutadapt<br>adaptor<br>trim pairs | DADA2<br>quality<br>filter pairs | DADA2<br>merged<br>reads | DADA2<br>non-chimeric<br>reads | % Reads<br>retained |
|-------------------------|-------------------|-----------------------------------|----------------------------------|--------------------------|--------------------------------|---------------------|
| LrCOI_1804_P22_v_BSsG   | 150,873           | 149,582                           | 135,975                          | 121,502                  | 115,368                        | 76.5                |
| LrCOI_1804_P4_v_BSsG    | 101,257           | 100,201                           | 90,265                           | 85,884                   | 79,220                         | 78.2                |
| LrCOI_1804_P8_o_BSsG    | 108,646           | 107,803                           | 95,616                           | 88,954                   | 85,871                         | 79.0                |
| LrCOI_1804_P28_v_BSsG   | 156,378           | 154,821                           | 139,414                          | 129,924                  | 125,243                        | 80.1                |
| LrCOI_1804_P38_o_BSsG   | 133,564           | 132,184                           | 119,713                          | 112,939                  | 107,897                        | 80.8                |
| LrCOI_1804_P402_v_BSsG  | 121,640           | 120,730                           | 116,599                          | 111,413                  | 89,640                         | 73.7                |
| LrCOI_1804_P12_v_BSsG   | 144,158           | 142,748                           | 129,061                          | 124,594                  | 119,720                        | 83.0                |
| LrCOI_1809_P22_v_BSsG   | 127,444           | 126,318                           | 109,545                          | 102,749                  | 96,069                         | 75.4                |
| LrCOI_1809_P8_o_BSsG    | 87,162            | 86,450                            | 76,048                           | 71,877                   | 67,898                         | 77.9                |
| LrCOI_1809_P38_o_BSsG   | 122,167           | 121,178                           | 111,784                          | 105,531                  | 101,428                        | 83.0                |
| Cop16S_1809_P22_v_BSsF  | 137,205           | 136,193                           | 133,616                          | 131,032                  | 128,862                        | 93.9                |
| Cop16S_1809_P8_v_BSsF   | 202,613           | 201,185                           | 197,483                          | 190,517                  | 187,912                        | 92.7                |
| Cop16S_1809_P28_v_BSsF  | 90,101            | 89,543                            | 88,037                           | 86,085                   | 85,810                         | 95.2                |
| Cop16S_1809_P38_v_BSsF  | 174,617           | 173,419                           | 169,535                          | 165,757                  | 164,272                        | 94.1                |
| Cop16S_1809_P38_o_BSsF  | 168,079           | 165,725                           | 158,603                          | 156,161                  | 155,122                        | 92.3                |
| Cop16S_1809_P402_v_BSsF | 96,453            | 95,784                            | 93,519                           | 92,727                   | 92,666                         | 96.1                |
| Cop16S_1809_P12_v_BSsF  | 138,550           | 137,047                           | 133,197                          | 132,113                  | 131,319                        | 94.8                |

|                           |         |         |         |         |         |      |
|---------------------------|---------|---------|---------|---------|---------|------|
| Mol16S_1804_P22_v_BS20    | 340,156 | 318,984 | 307,240 | 303,699 | 289,206 | 85.0 |
| Mol16S_1804_P4_v_A_KAsH   | 88,068  | 54,754  | 48,913  | 44,689  | 42,708  | 48.5 |
| Mol16S_1804_P4_v_BS20     | 210,286 | 198,775 | 187,630 | 175,458 | 164,106 | 78.0 |
| Mol16S_1804_P8_v_BS20     | 273,904 | 256,405 | 246,976 | 242,168 | 225,155 | 82.2 |
| Mol16S_1804_P28_v_BS20    | 172,836 | 163,125 | 154,473 | 150,052 | 134,945 | 78.1 |
| Mol16S_1804_P402_v_BS20   | 411,653 | 391,621 | 382,218 | 380,908 | 377,995 | 91.8 |
| Mol16S_1804_P12_v_BS20    | 281,659 | 264,924 | 245,339 | 237,723 | 234,648 | 83.3 |
| Mol16S_1809_P4_v_BSsF     | 75,496  | 74,452  | 72,799  | 72,481  | 72,194  | 95.6 |
| Mol16S_1809_P4_v_BS20     | 120,707 | 112,828 | 104,191 | 102,302 | 101,328 | 83.9 |
| Mol16S_1809_P8_v_BS20     | 261,369 | 245,141 | 235,881 | 233,083 | 224,636 | 85.9 |
| Mol16S_1809_P8_o_BSsF     | 107,398 | 105,762 | 104,281 | 103,382 | 102,581 | 95.5 |
| Mol16S_1809_P28_v_BS20    | 284,093 | 264,123 | 252,036 | 248,801 | 241,705 | 85.1 |
| Mol16S_1809_P38_v_BSsF    | 54,579  | 53,981  | 53,073  | 51,898  | 51,156  | 93.7 |
| Mol16S_1809_P38_v_BS20    | 371,415 | 347,162 | 329,333 | 325,487 | 315,458 | 84.9 |
| Mol16S_1809_P38_o_BSsF    | 193,581 | 191,306 | 187,602 | 182,944 | 179,128 | 92.5 |
| Mol16S_1809_P402_v_BSsF   | 107,610 | 106,323 | 103,254 | 102,650 | 102,441 | 95.2 |
| Mol16S_1809_P402_v_BS20   | 146,364 | 136,669 | 128,173 | 126,414 | 121,454 | 83.0 |
| Mol16S_1809_P12_v_BSsF    | 69,173  | 68,317  | 67,517  | 67,084  | 66,351  | 95.9 |
| Mol16S_1809_P12_v_BS20    | 265,703 | 240,887 | 212,225 | 207,240 | 197,702 | 74.4 |
| Mol16S_FB_1804_P22_v_BS20 | 243,775 | 228,289 | 220,530 | 218,162 | 212,268 | 87.1 |

|                            |         |         |         |         |         |      |
|----------------------------|---------|---------|---------|---------|---------|------|
| Mol16S_FB_1804_P4_v_BS20   | 175,305 | 165,465 | 157,998 | 150,335 | 143,039 | 81.6 |
| Mol16S_FB_1804_P8_v_BS20   | 168,262 | 157,248 | 152,275 | 149,901 | 142,989 | 85.0 |
| Mol16S_FB_1804_P28_v_BS20  | 127,931 | 120,053 | 114,586 | 113,152 | 107,279 | 83.9 |
| Mol16S_FB_1804_P38_v_BSsH  | 132,895 | 131,252 | 127,581 | 126,125 | 116,578 | 87.7 |
| Mol16S_FB_1804_P402_v_BS20 | 219,543 | 208,861 | 204,141 | 203,563 | 202,573 | 92.3 |
| Mol16S_FB_1804_P12_v_BS20  | 209,625 | 197,201 | 185,006 | 183,493 | 183,029 | 87.3 |
| Mol16S_FB_1809_P22_v_BSsH  | 122,139 | 120,675 | 119,194 | 118,594 | 116,908 | 95.7 |
| Mol16S_FB_1809_P22_v_BS20  | 273,612 | 257,489 | 248,794 | 245,575 | 229,427 | 83.9 |
| Mol16S_FB_1809_P4_v_BS20   | 266,993 | 249,868 | 237,842 | 232,855 | 221,668 | 83.0 |
| Mol16S_FB_1809_P8_v_BS20   | 188,850 | 176,448 | 165,853 | 162,941 | 156,469 | 82.9 |
| Mol16S_FB_1809_P8_o_BSsH   | 127,489 | 124,953 | 113,484 | 111,308 | 109,637 | 86.0 |
| Mol16S_FB_1809_P28_v_BS20  | 296,595 | 278,120 | 268,091 | 265,814 | 262,380 | 88.5 |
| Mol16S_FB_1809_P38_v_BS20  | 177,721 | 166,656 | 157,995 | 155,850 | 151,412 | 85.2 |
| Mol16S_FB_1809_P38_o_BSsH  | 114,588 | 113,016 | 109,954 | 108,149 | 106,240 | 92.7 |
| Mol16S_FB_1809_P402_v_BSsH | 98,063  | 96,476  | 93,600  | 92,706  | 91,669  | 93.5 |
| Mol16S_FB_1809_P402_v_BS20 | 167,697 | 157,135 | 148,533 | 146,509 | 140,963 | 84.1 |
| Mol16S_FB_1809_P12_v_BSsH  | 52,628  | 51,961  | 50,322  | 49,928  | 48,421  | 92.0 |
| Mol16S_FB_1809_P12_v_BS20  | 211,086 | 194,094 | 186,050 | 183,867 | 174,837 | 82.8 |
| MiFish12S_1804_P22_v_BS20  | 161,912 | 144,423 | 57,662  | 56,608  | 56,224  | 34.7 |
| MiFish12S_1804_P4_v_BS20   | 206,536 | 193,698 | 155,051 | 152,901 | 151,255 | 73.2 |

|                            |         |         |         |         |         |      |
|----------------------------|---------|---------|---------|---------|---------|------|
| MiFish12S_1804_P8_v_BS20   | 270,810 | 247,369 | 84,739  | 83,850  | 83,815  | 30.9 |
| MiFish12S_1804_P28_v_BS20  | 181,119 | 169,663 | 135,577 | 134,064 | 130,997 | 72.3 |
| MiFish12S_1804_P38_v_BS20  | 197,727 | 185,713 | 158,503 | 157,094 | 155,507 | 78.6 |
| MiFish12S_1804_P402_v_BS20 | 180,170 | 166,603 | 86,145  | 85,308  | 85,284  | 47.3 |
| MiFish12S_1804_P12_v_BS20  | 147,083 | 138,556 | 124,580 | 124,145 | 123,226 | 83.8 |
| MiFish12S_1809_P4_v_BS20   | 260,375 | 236,628 | 49,458  | 49,401  | 49,398  | 19.0 |
| MiFish12S_1809_P8_o_BSsE   | 49,389  | 49,182  | 48,840  | 48,773  | 48,773  | 98.8 |
| MiFish12S_1809_P38_v_BS20  | 230,787 | 218,826 | 176,369 | 175,660 | 174,276 | 75.5 |
| MiFish12S_1809_P38_o_BSsE  | 107,889 | 107,356 | 106,671 | 105,563 | 103,768 | 96.2 |
| FishCytb_1804_P22_v_BSsH   | 72,705  | 72,058  | 71,004  | 70,429  | 69,597  | 95.7 |
| FishCytb_1804_P22_v_BS20   | 256,483 | 247,444 | 130,668 | 127,102 | 125,388 | 48.9 |
| FishCytb_1804_P4_v_BSsH    | 73,304  | 72,706  | 72,310  | 71,687  | 70,225  | 95.8 |
| FishCytb_1804_P4_v_BS20    | 266,189 | 260,623 | 256,740 | 252,260 | 245,441 | 92.2 |
| FishCytb_1804_P8_v_BS20    | 284,845 | 276,670 | 268,384 | 261,365 | 242,182 | 85.0 |
| FishCytb_1804_P8_o_BSsH    | 97,103  | 96,300  | 95,464  | 94,176  | 93,542  | 96.3 |
| FishCytb_1804_P28_v_BSsH   | 55,917  | 55,440  | 55,049  | 54,720  | 54,047  | 96.7 |
| FishCytb_1804_P28_v_BS20   | 279,533 | 273,164 | 257,561 | 254,781 | 250,962 | 89.8 |
| FishCytb_1804_P38_o_BSsH   | 179,803 | 178,414 | 177,440 | 176,088 | 171,735 | 95.5 |
| FishCytb_1804_P402_v_BS20  | 176,161 | 172,383 | 168,248 | 165,780 | 164,975 | 93.7 |
| FishCytb_1804_P12_v_BSsH   | 81,579  | 80,989  | 80,581  | 80,406  | 80,397  | 98.6 |

|                          |         |         |         |         |         |      |
|--------------------------|---------|---------|---------|---------|---------|------|
| FishCytb_1804_P12_v_BS20 | 217,277 | 211,658 | 208,411 | 207,696 | 207,654 | 95.6 |
| FishCytb_1809_P28_v_BS20 | 103,187 | 100,581 | 87,654  | 85,888  | 85,218  | 82.6 |
| FishCytb_1809_P38_v_BSsH | 86,832  | 86,101  | 85,563  | 85,312  | 84,324  | 97.1 |
| FishCytb_1809_P38_v_BS20 | 132,817 | 130,377 | 128,086 | 126,772 | 125,063 | 94.2 |
| FishCytb_1809_P38_o_BSsH | 62,214  | 61,682  | 61,217  | 61,051  | 61,013  | 98.1 |

**Supplementary Table S5. Species studied in the laboratory and whether or not they were detected in this metabarcoding study.**

| Species name and authority                              | Common name      | Detected in this study |
|---------------------------------------------------------|------------------|------------------------|
| <i>Clupeonella cultriventris</i> (von Nordmann, 1840)   | Black Sea sprat  | yes                    |
| <i>Dreissena rostriformis bugensis</i> (Andrusov, 1897) | Quagga mussel    | no                     |
| <i>Dreissena polymorpha</i> (Pallas, 1771)              | Zebra mussel     | yes                    |
| <i>Etheostoma blennioides</i> Rafinesque, 1819          | Greenside darter | no                     |
| <i>Gymnocephalus cernua</i> (Linnaeus, 1758)            | Eurasian ruffe   | yes                    |
| <i>Hypophthalmichthys molitrix</i> (Valenciennes, 1844) | Silver carp      | no                     |
| <i>Micropterus dolomieu</i> Lacepède, 1802              | Smallmouth bass  | no*                    |
| <i>Neogobius melanostomus</i> (Pallas, 1814)            | Round goby       | no                     |
| <i>Perca flavescens</i> (Mitchill, 1814)                | Yellow perch     | no                     |
| <i>Perca fluviatilis</i> Linnaeus, 1758                 | European perch   | no                     |
| <i>Percina caprodes</i> (Rafinesque, 1818)              | Common logperch  | no                     |
| <i>Sander vitreus</i> (Mitchill, 1818)                  | Walleye          | yes*                   |

\*= Known from freshwaters and/or estuaries in the Salish Sea and/or NE Pacific region (USGS NAS 2023 [50])

**Supplementary Table S6. Assessment of assigned sequence variants (ASVs) to putative nonindigenous species.** \*Best percent identity (PID) to putative nonindigenous species. Range shown for multi-ASV taxa. FB=results with fish blocker primer.  
N/A=Not Available.

| Marker:<br>Putative<br>nonindigenous<br>species      | N<br>ASVs | Total<br>Reads<br>(Rel.<br>Abund.<br>Range) | N<br>Unique<br>Samples | PID* to<br>putative<br>nonindigenous<br>species | Next closest hit<br>species name<br>(PID)    | Potential local species<br>(marker genes available<br>for comparison)                                                                                                                                                                                                                                                                                                                    | Confidence<br>(reason)                                                                      |
|------------------------------------------------------|-----------|---------------------------------------------|------------------------|-------------------------------------------------|----------------------------------------------|------------------------------------------------------------------------------------------------------------------------------------------------------------------------------------------------------------------------------------------------------------------------------------------------------------------------------------------------------------------------------------------|---------------------------------------------------------------------------------------------|
| <b>LrCOI:</b><br><i>Proceraea okadai</i>             | 1         | 14<br>(0.02)                                | 1                      | 99.7                                            | <i>Proceraea<br/>nigropunctata</i><br>(86.6) | <i>Proceraea hanssoni</i><br>(16S, COI),<br><i>Proceraea nigropuncatata</i><br>(16S, COI)                                                                                                                                                                                                                                                                                                | <b>High</b> (High PID<br>match, no close<br>hit to local<br>species)                        |
| <b>Mol16S:</b><br><i>Proceraea okadai</i>            | 1         | 7<br>(0.01)                                 | 1                      | 98.9                                            | <i>Proceraea<br/>nigropunctata</i><br>(91.6) |                                                                                                                                                                                                                                                                                                                                                                                          |                                                                                             |
| <b>Mol16S_FB:</b><br><i>Proceraea okadai</i>         | 1         | 11<br>(0.01)                                | 1                      | 98.9                                            | <i>Proceraea<br/>nigropunctata</i><br>(91.6) |                                                                                                                                                                                                                                                                                                                                                                                          |                                                                                             |
| <b>FishCytb:</b><br><i>Hediste diadroma</i>          | 1         | 12<br>(0.01)                                | 1                      | 100                                             | <i>Hediste japonica</i><br>(84.3)            | <i>Hediste limnicola</i><br>(16S, <u>no cytb</u> )                                                                                                                                                                                                                                                                                                                                       | <b>High</b> (High PID<br>match, no close<br>hit for local<br>species)                       |
| <b>Mol16S:</b><br><i>Hediste diadroma</i>            | 1         | 12<br>(<0.01)                               | 2                      | 100                                             | <i>Hediste japonica</i><br>(96.1)            |                                                                                                                                                                                                                                                                                                                                                                                          |                                                                                             |
| <b>Mol16S_FB:</b><br><i>Hediste diadroma</i>         | 1         | 89<br>(<0.01-<br>0.03)                      | 3                      | 100                                             | <i>Hediste japonica</i><br>(96.1)            |                                                                                                                                                                                                                                                                                                                                                                                          |                                                                                             |
| <b>Cop16S:</b><br><i>Leonardsaxius<br/>amurensis</i> | 1         | 36<br>(0.02)                                | 1                      | 97.6                                            | <i>Eiconaxius<br/>borradailei</i> (83.3)     | <i>Leonardsaxius<br/>spinulicauda</i><br>( <u>no 16S</u> )                                                                                                                                                                                                                                                                                                                               | <b>Low</b> (Low<br>rRNA PID<br>match, no<br>marker<br>reference for<br>local species)       |
| <b>Mol16S:</b><br><i>Leonardsaxius<br/>amurensis</i> | 1         | 24<br>(0.01)                                | 1                      | 97.1                                            | <i>Pugnatrypaea<br/>pugnatrix</i> (91.5)     |                                                                                                                                                                                                                                                                                                                                                                                          |                                                                                             |
| <b>LrCOI:</b><br><i>Crangon crangon</i>              | 1         | 30<br>(0.04)                                | 1                      | 97.3                                            | <i>Crangon<br/>septemspinosa</i><br>(94.0)   | <i>Crangon alaskensis</i> (COI,<br><u>no 16S</u> ), <i>Crangon alba</i><br>( <u>no COI or 16S</u> ),<br><i>Crangon dalli</i> ( <u>no COI<br/>or 16S</u> ), <i>Crangon<br/>franciscorum</i> (COI, <u>no<br/>16S</u> ), <i>Crangon nigricauda</i><br>( <u>no COI or 16S</u> ),<br><i>Crangon holmesii</i> ( <u>no<br/>COI or 16S</u> ), <i>Crangon<br/>lockingtonii</i> ( <u>no COI or</u> | <b>Low</b> (High PID<br>match, no 16S<br>and limited COI<br>reference for<br>local species) |
| <b>Cop16S:</b><br><i>Crangon crangon</i>             | 2         | 185<br>(<0.01-<br>0.18)                     | 4                      | 99.1                                            | <i>Neocrangon<br/>sagamiensis</i><br>(93.4)  |                                                                                                                                                                                                                                                                                                                                                                                          |                                                                                             |



|                                                   |   |                     |   |           |                                         |                                                                                                                                                                                                                                                                                                                                                        |                                                                                                  |
|---------------------------------------------------|---|---------------------|---|-----------|-----------------------------------------|--------------------------------------------------------------------------------------------------------------------------------------------------------------------------------------------------------------------------------------------------------------------------------------------------------------------------------------------------------|--------------------------------------------------------------------------------------------------|
|                                                   |   |                     |   |           |                                         | <u>16S</u> ), <i>Crangon nigromaculata</i> ( <u>no COI or 16S</u> ), <i>Crangon capensis</i> ( <u>no COI or 16S</u> )                                                                                                                                                                                                                                  |                                                                                                  |
| <b>Mol16S:</b><br><i>Lucinoma borealis</i>        | 3 | 2399<br>(0.53-1.28) | 3 | 97.1-97.8 | N/A                                     | <i>Lucinoma annulata</i> ( <u>no 16S</u> )                                                                                                                                                                                                                                                                                                             | <b>Low</b> (Low rRNA PID match, no marker ref. for local species)                                |
| <b>Mol16S_FB:</b><br><i>Lucinoma borealis</i>     | 2 | 2914<br>(0.37-2.15) | 2 | 97.8      | N/A                                     |                                                                                                                                                                                                                                                                                                                                                        |                                                                                                  |
| <b>Mol16S:</b><br><i>Dreissena polymorpha</i>     | 3 | 500<br>(<0.01-0.46) | 6 | 99.4-100  | <i>Dreissena presbensis</i> (96.1)      | No local species, invasive throughout much of North America, multiple introductions from the Ponto-Caspian region [50]                                                                                                                                                                                                                                 | <b>High</b> (High PID match, no known local species)                                             |
| <b>Mol16S_FB:</b><br><i>Dreissena polymorpha</i>  | 7 | 8682<br>(0.05-7.46) | 8 | 98.3-100  | <i>Dreissena presbensis</i> (96.1)      |                                                                                                                                                                                                                                                                                                                                                        |                                                                                                  |
| <b>FishCytb:</b> <i>Alosa sapidissima</i>         | 1 | 129<br>(0.06)       | 1 | 100       | <i>Alosa alabamae</i> (99.4)            | No known local species, introduced to San Francisco Bay and Salish Sea [50]                                                                                                                                                                                                                                                                            | <b>High</b> (High PID match, no known local species)                                             |
| <b>FishCytb:</b><br><i>Liparis ochotensis</i>     | 2 | 462<br>(0.01-0.55)  | 3 | 98.7-99.4 | <i>Liparis liparis</i> (94.8)           | <i>Liparis adiastol</i> ( <u>no cytb</u> ), <i>Liparis callyodon</i> ( <u>no cytb</u> ), <i>Liparis cyclopus</i> ( <u>no cytb</u> ), <i>Liparis dennyi</i> (cytb), <i>Liparis florae</i> (cytb), <i>Liparis fucensis</i> ( <u>no cytb</u> ), <i>Liparis greeni</i> ( <u>no cytb</u> ), <i>Liparis mucosus</i> (cytb), <i>Liparis pulchellus</i> (cytb) | <b>Low</b> (High PID match, only 44% of potential local species have marker reference sequences) |
| <b>Mol16S:</b><br><i>Cryptacanthodes bergi</i>    | 1 | 376<br>(0.16-0.25)  | 2 | 99.3      | <i>Cryptacanthodes giganteus</i> (98.6) | <i>Cryptacanthodes aleutensis</i> ( <u>no 16S</u> ), <i>Cryptacanthodes giganteus</i> (16S)                                                                                                                                                                                                                                                            | <b>Low</b> (High PID match, only one of the two local species has marker reference)              |
| <b>Mol16S_FB:</b><br><i>Cryptacanthodes bergi</i> | 1 | 98<br>(0.07)        | 1 | 99.3      | <i>Cryptacanthodes giganteus</i> (98.6) |                                                                                                                                                                                                                                                                                                                                                        |                                                                                                  |

## Supplementary Figures

**Supplementary Figure S1. Taxonomic and read count/relative abundance information viewed through Krona plot hierarchical data browsers.** doi:[10.6084/m9.figshare.21791738](https://doi.org/10.6084/m9.figshare.21791738)).

**Supplementary Figure S2A. Decapoda Crustacea species resolved by morphology and/or four metabarcoding markers.**

Filled circles denote presence, empty circles indicate that the taxon was not detected, and missing circles show lack of resolution for that method.

**Supplementary Figure S2B. Cnidaria species resolved by morphology and/or four metabarcoding markers.**

Filled circles denote presence, empty circles indicate that the taxon was not detected, and missing circles show lack of resolution for that method.

**Supplementary Figure S2C. Echinodermata species resolved by morphology and/or three invertebrate metabarcoding markers.**

Filled circles denote presence, empty circles indicate that the taxon was not detected, and missing circles show lack of resolution for that method.

**Supplementary Figure S2D. Gastropoda Mollusca species resolved by morphology and/or three metabarcoding markers.**

Filled circles denote presence, empty circles indicate that the taxon was not detected, and missing circles show lack of resolution for that method.

**Supplementary Figure S2E. Actinopterygii (Teleostei) fish species resolved by morphology and/or four metabarcoding markers.**

Filled circles denote presence, empty circles indicate that the taxon was not detected, and missing circles show lack of resolution for that method.

**Supplementary Figure S3. Proportion of Arthropoda species carbon biomass versus proportion of Arthropoda sequence reads from metabarcoding marker LrCOI**

Regression fit  $R^2$ , with adjusted  $p$ -values for multiple comparisons [per 92], and Pearson correlation ( $r$ ) coefficients indicated.

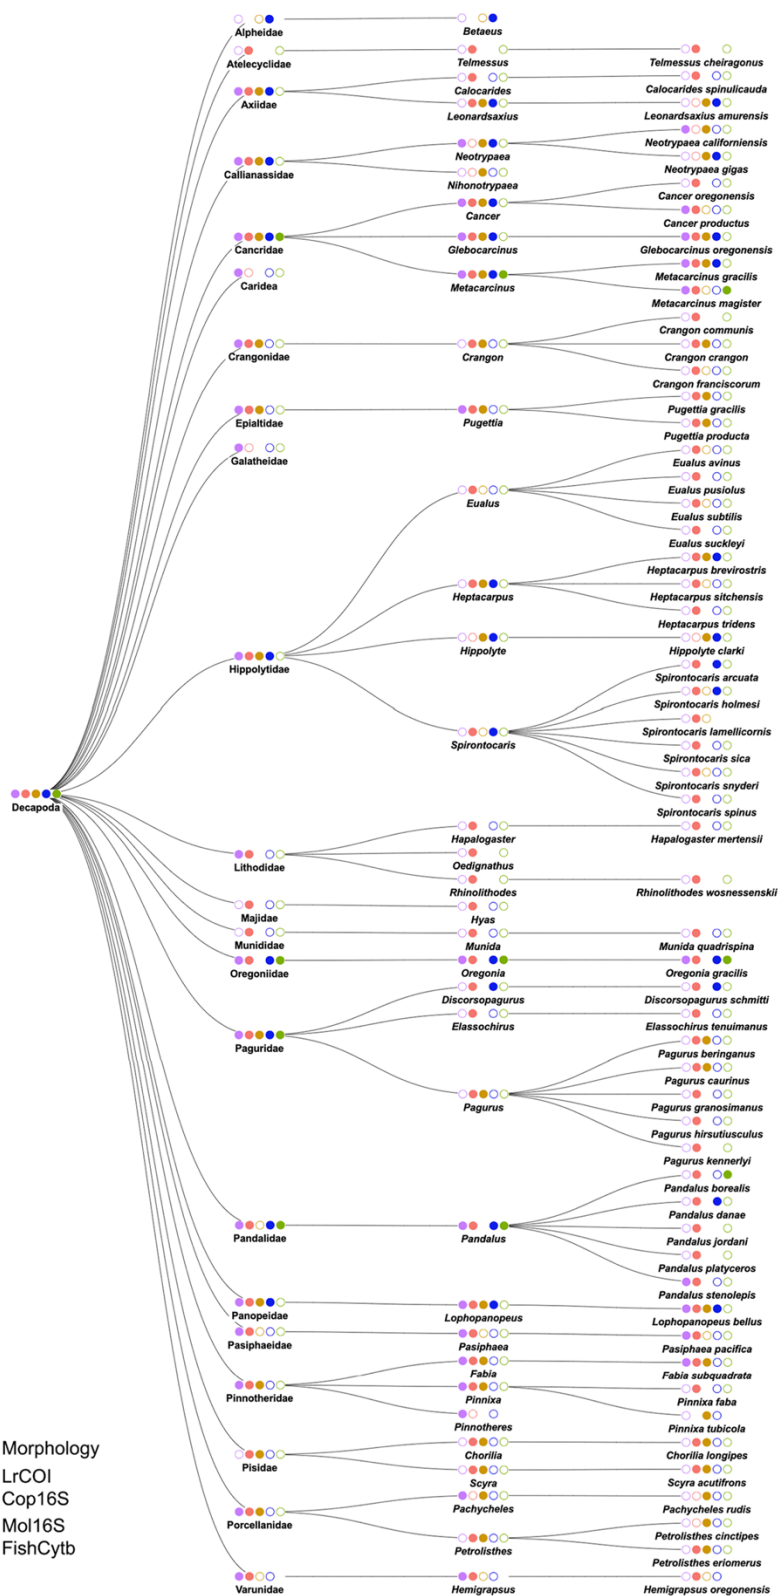

**Supplementary Figure S2A. Decapoda Crustacea species resolved by morphology and/or four metabarcoding markers.**

Filled circles denote identification, empty circles indicate that the taxon was not detected, and missing circles show lack of resolution for that method.

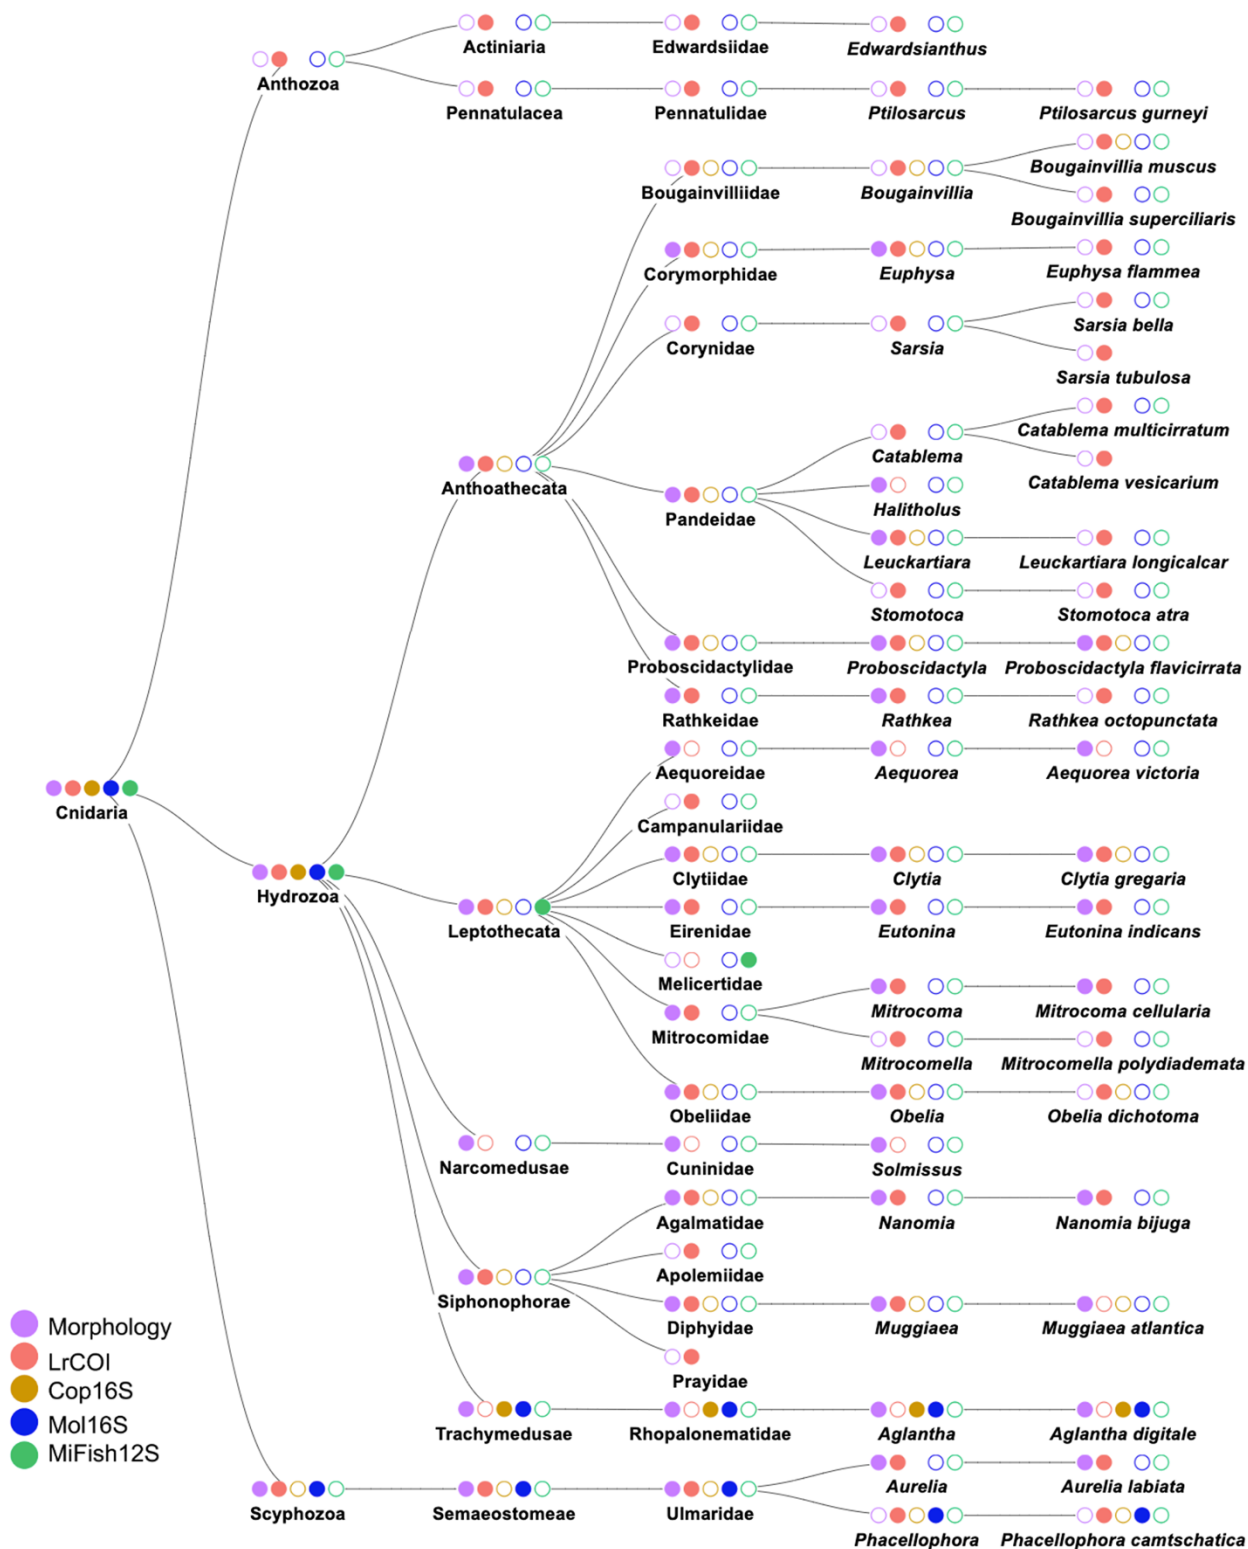

**Supplementary Figure S2B. Cnidaria species resolved by morphology and/or four metabarcoding markers.**

Filled circles denote identification, empty circles indicate it was not detected, and missing circles show lack of resolution by that method.

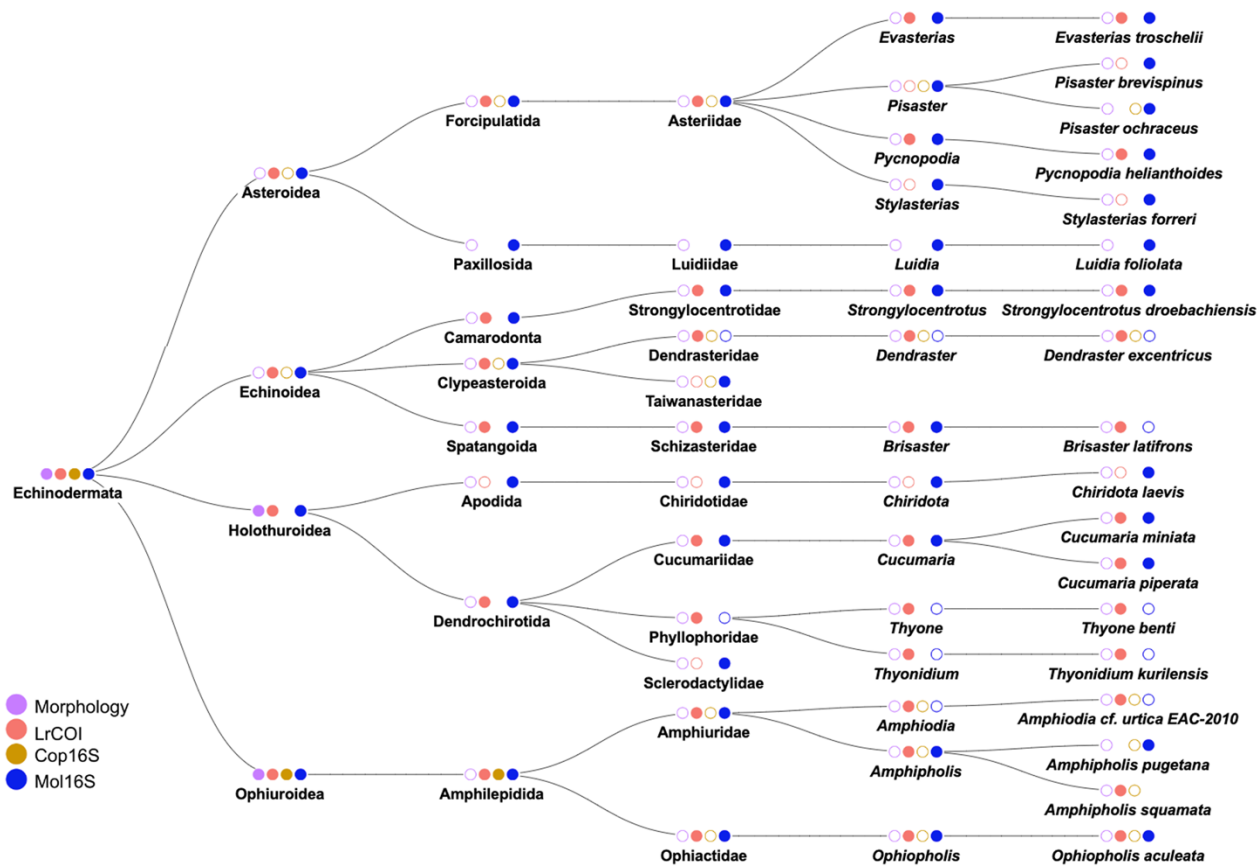

**Supplementary Figure S2C. Echinodermata species resolved by morphology and/or three invertebrate metabarcoding markers.**

Filled circles denote presence, empty circles indicate that the taxon was not detected, and missing circles show lack of resolution for that method.



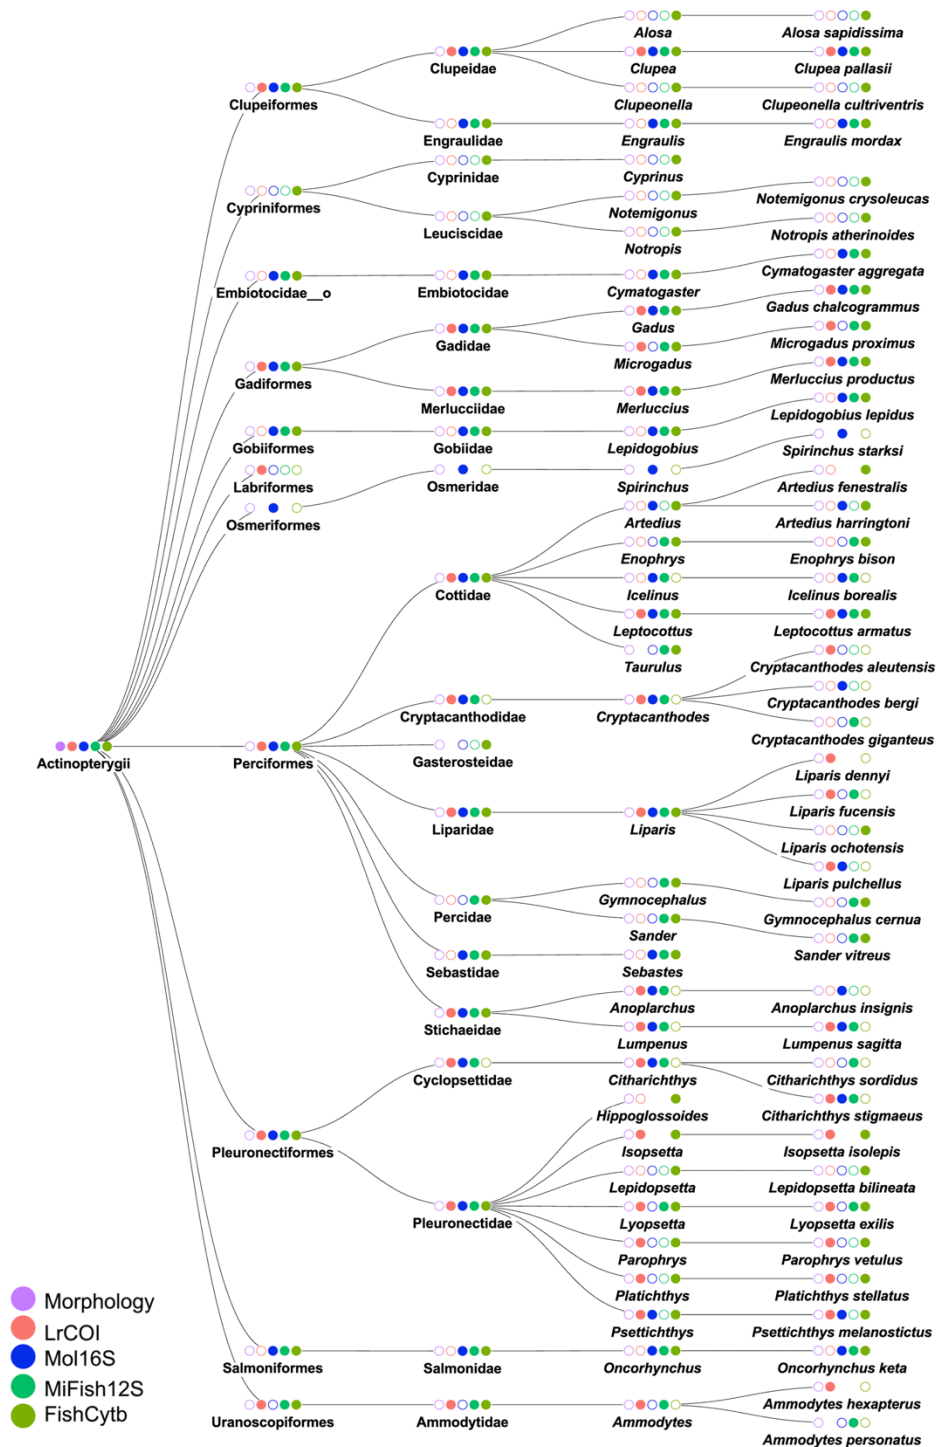

Supplementary Figure S2E. Actinopterygii (Teleostei) fish species resolved by morphology and/or four metabarcoding markers.

Filled circles denote presence, empty circles indicate that the taxon was not detected, and missing circles show lack of resolution for that method.

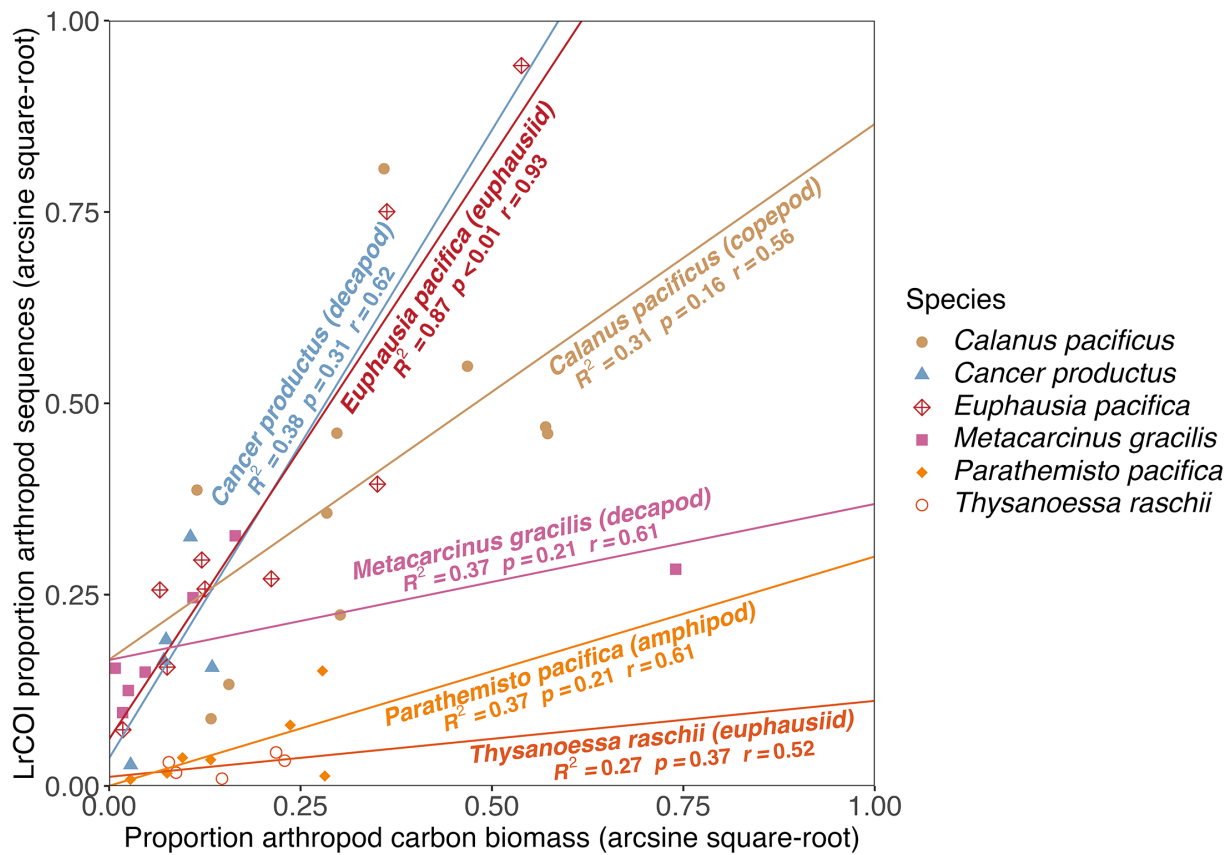

**Supplementary Figure S3. Proportion of Arthropoda species carbon biomass versus proportion of sequence reads (ASVs merged per species) from metabarcoding marker LrCOI.**

Regression fit  $R^2$ , with adjusted  $p$ -values for multiple comparisons [per 92], and Pearson correlation ( $r$ ) coefficients indicated.
