# Supplementary material for: Evaluating Metabarcoding Markers for Identifying Zooplankton and Ichthyoplankton Communities to Species in the Salish Sea: Morphological Comparisons and Rare, Threatened or Invasive Species
Source: MDPI journal article supplement (doi:10.3390/dna4010001), 2023-12-22
Supplement: s1 [file s1]

**Supplementary Table S3. Amplicon sequence variant (ASV) counts for each metabarcoding marker**

| Metabarcoding<br>marker name<br>(gene region)             | Total N<br>ASVs | For ASVs classified to species |                     |                                          | For ASVs classified to at least genus |                    |                                        | N Metazoan<br>ASVs | N Metazoan<br>ASVs classified<br>to species<br>(N unique<br>species) | N Metazoan<br>ASVs classified<br>to at least genus<br>(N unique<br>genera) |
|-----------------------------------------------------------|-----------------|--------------------------------|---------------------|------------------------------------------|---------------------------------------|--------------------|----------------------------------------|--------------------|----------------------------------------------------------------------|----------------------------------------------------------------------------|
|                                                           |                 | Total N<br>ASVs                | N unique<br>species | Median % identity<br>for species matches | Total N<br>ASVs                       | N unique<br>genera | Median % identity<br>for genus matches |                    |                                                                      |                                                                            |
| <b>LrCOI</b><br>(mitochondrial<br>cytochrome c oxidase I) | 1321            | 571                            | 177                 | 99.4%                                    | 680                                   | 140                | 94.9%                                  | 1006               | 560<br>(167)                                                         | 669<br>(130)                                                               |
| <b>Mol16S*</b><br>(mitochondrial 16S<br>ribosomal RNA)    | 911/1150        | 343/382                        | 126/129             | 99.4%/99.4%                              | 479/538                               | 134/137            | 96.4%/96.4%                            | 813/852            | 338/376<br>(122/124)                                                 | 474/532<br>(130/132)                                                       |
| <b>Cop16S</b><br>(mitochondrial 16S<br>ribosomal RNA)     | 383             | 147                            | 45                  | 99.7%                                    | 167                                   | 41                 | 96.3%                                  | 341                | 147<br>(45)                                                          | 167<br>(41)                                                                |
| <b>MiFish12S</b><br>(mitochondrial 12S<br>ribosomal RNA)  | 651             | 41                             | 23                  | 99.4%                                    | 50                                    | 26                 | 99.4%                                  | 51                 | 37<br>(20)                                                           | 46<br>(23)                                                                 |
| <b>FishCytb</b><br>(mitochondrial<br>cytochrome b)        | 1261            | 95                             | 38                  | 99.4%                                    | 108                                   | 43                 | 96.8%                                  | 432                | 93<br>(36)                                                           | 106<br>(41)                                                                |
